# Supplementary material for: Electroanalytical method for the determination of 5-fluorouracil using a reduced graphene oxide/chitosan modified sensor
Source: Royal Society of Chemistry journal article supplement (doi:10.1039/c5ra04396d), 2015-01-01

## Supporting information

SI. Fig. 1. UV-vis absorption spectra of the GO.

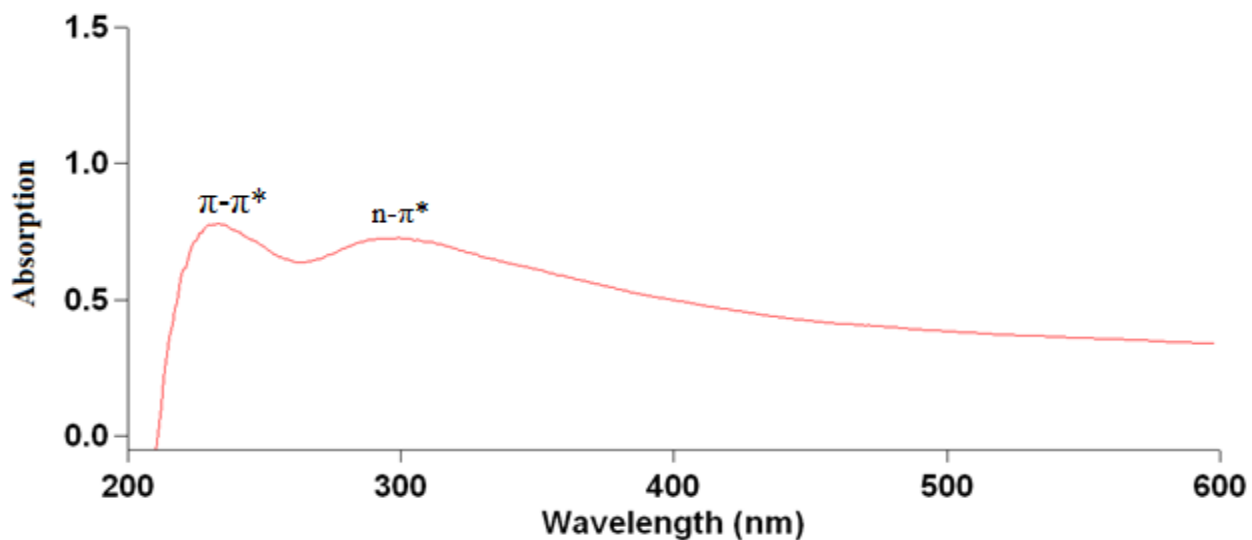

SI. Fig. 2. SCV of bare GCE in 5FU solution at different concentrations at (a) 0.1, (b) 0.3, (c) 0.5, (d) 0.7, (e) 0.9, (f) 1.1 and (g)  $1.3 \times 10^{-6}$  M (Inset: Plot of the peak currents against concentrations of 5FU).

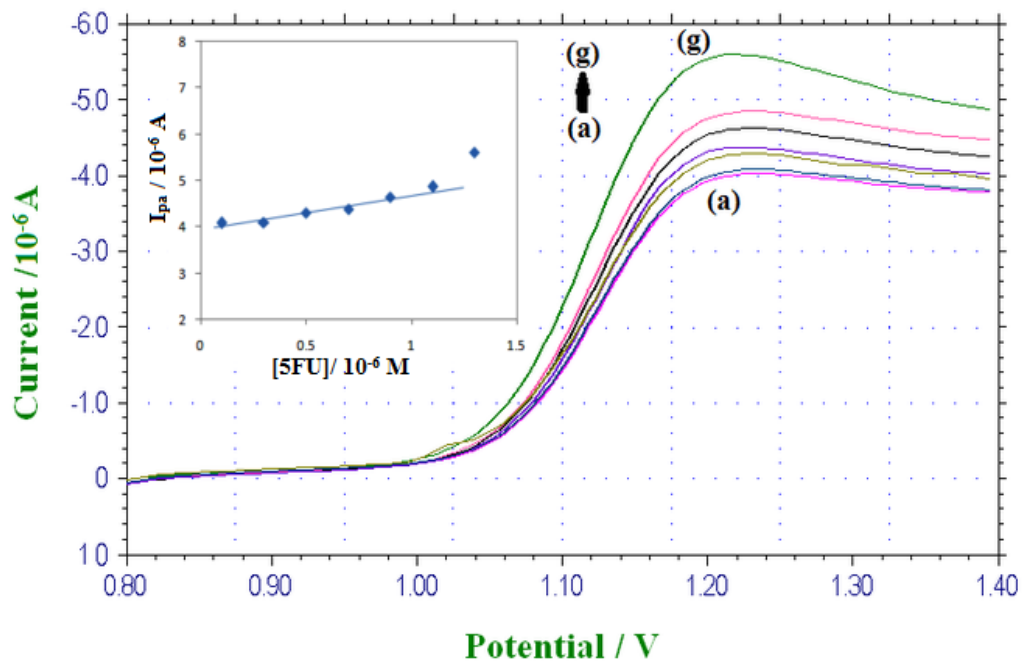

Supplement: c5ra04396d1.pdf [file c5ra04396d1.pdf]
